# Supplementary material
Source: PubMed Central journal article supplement (PMC5543325)
Supplement: jamadermatol-153-637-s002.pdf [file jamadermatol-153-637-s002.pdf]

## Supplementary Online Content

Petukhova TA, Hassoun LA, Foolad N, Barath M, Sivamani RK. Effect of expedited microneedle-assisted photodynamic therapy for field treatment of actinic keratoses: a randomized clinical trial. *JAMA Dermatol*. Published online May 17, 2017. doi:10.1001/jamadermatol.2017.0849

**eFigure 1.** Study protocol schematic

**eFigure 2.** Clinical photograph of a patient

This supplementary material has been provided by the authors to give readers additional information about their work.

## Supplementary eFigure 1. Study Protocol Schematic

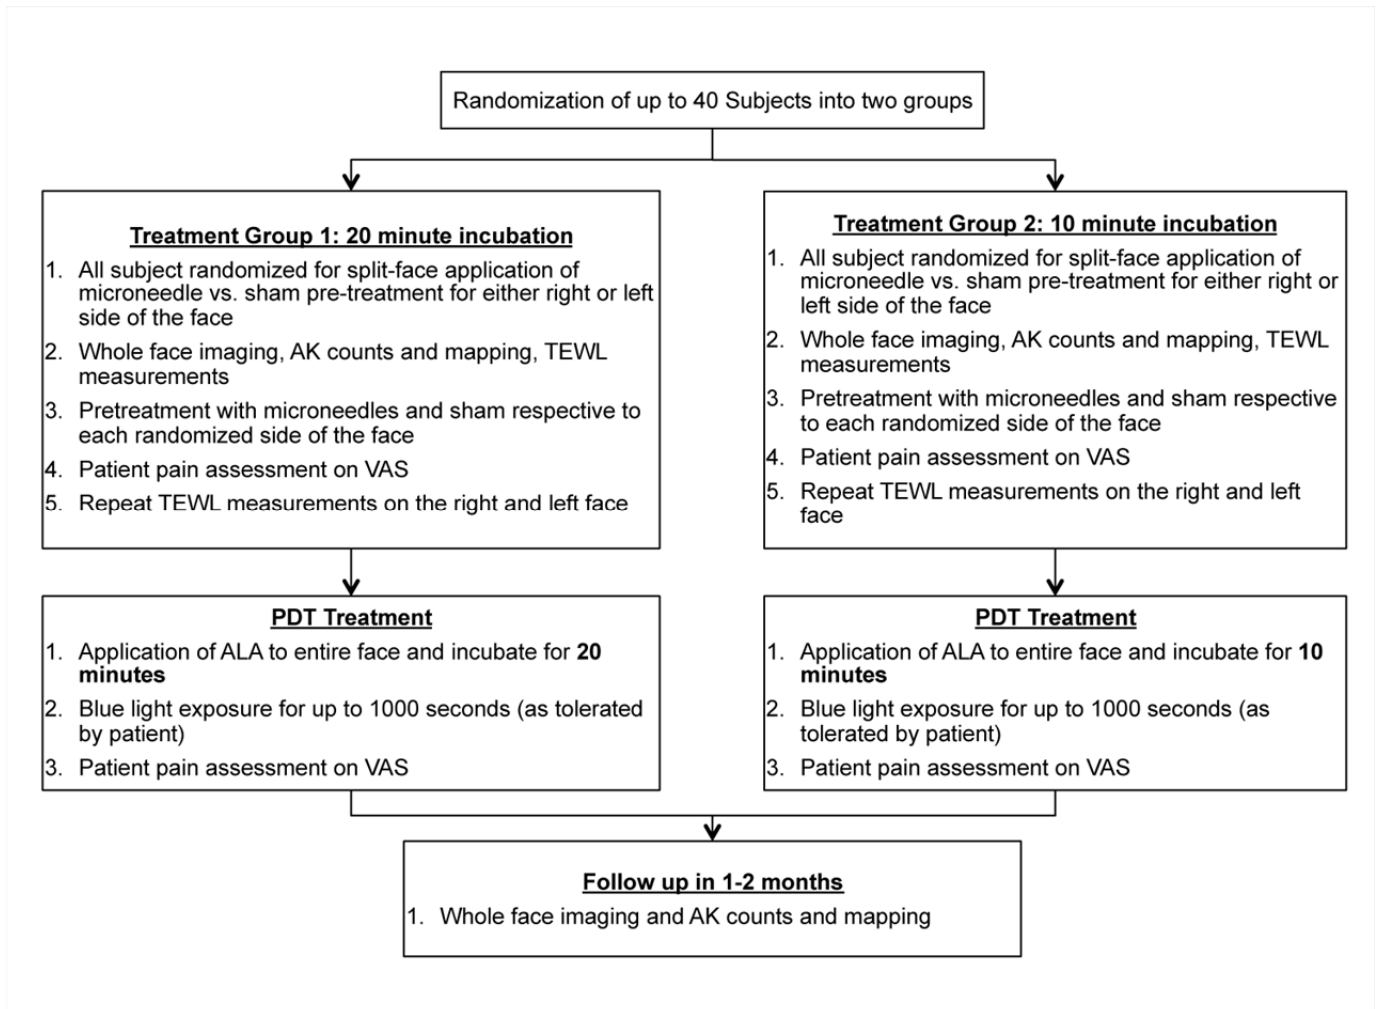

Abbreviations: AK (actinic keratoses), TEWL (transepidermal water loss), VAS (Visual Analog Scale), ALA (aminolevulinic acid), PDT (photodynamic therapy)

**Supplementary Figure 2.** Clinical photograph of a patient

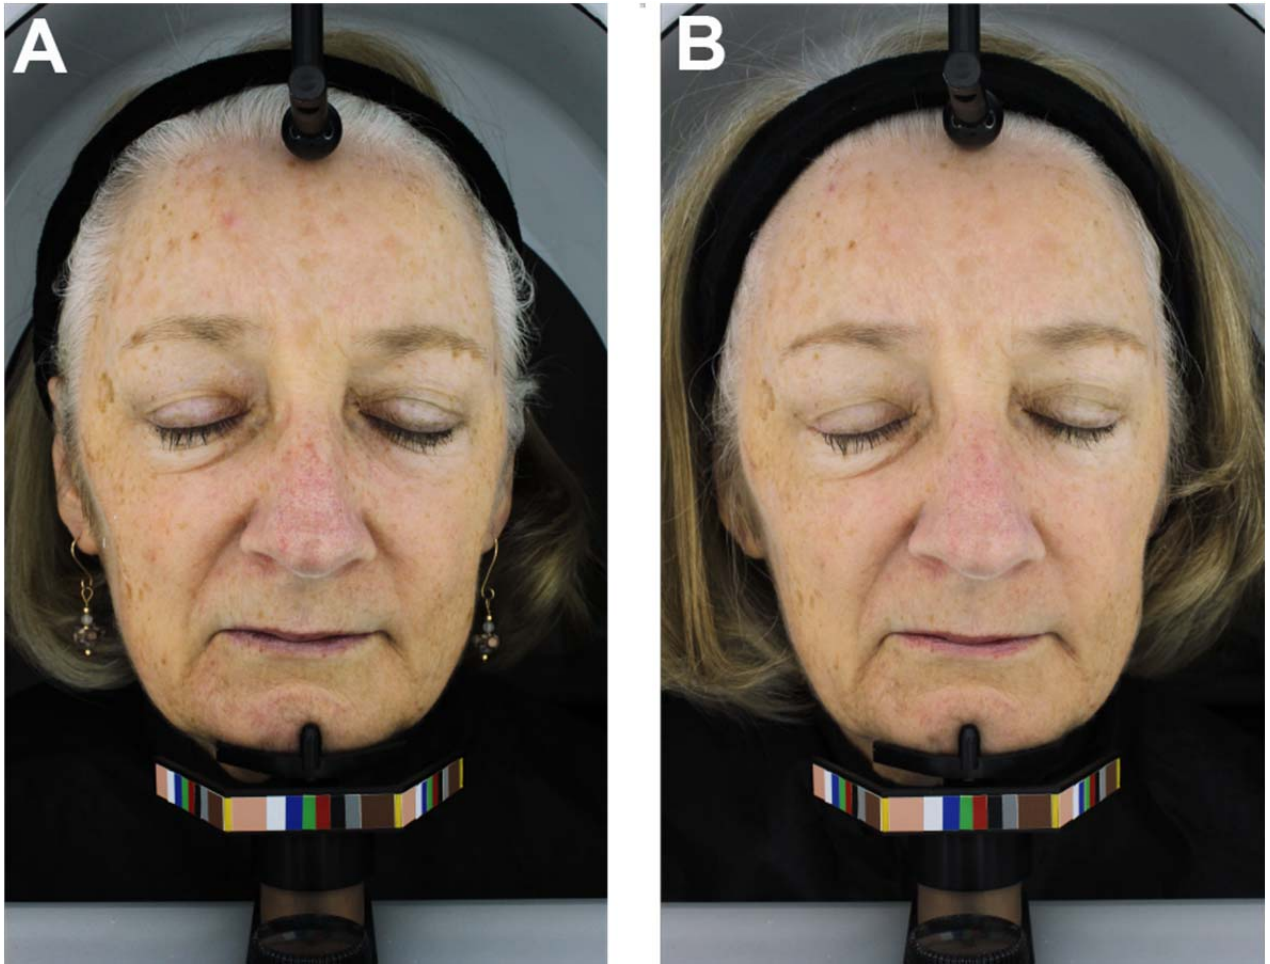

Clinical photograph of a patient before (A) and one month after (B) photodynamic therapy (Right: Microneedle side, Left: Sham Side).
